# Supplementary material
Source: PubMed Central journal article supplement (PMC4942959)
Supplement: AEM.00757-16_zam999117271so1.pdf [file AEM.00757-16_zam999117271so1.pdf]

# **Regulation of polyhydroxybutyrate synthesis in the soil bacterium *Bradyrhizobium diazoefficiens***

## **Supplemental Material**

J. I. Quelas<sup>a</sup>, S. Mesa<sup>b</sup>, E. J. Mongiardini<sup>a</sup>, D. Jendrossek<sup>c</sup> and A. R. Lodeiro<sup>a#</sup>

Laboratorio de Interacciones entre Rizobios y Soja (LIRyS) IBBM-Facultad de Ciencias Exactas, UNLP-CONICET (Argentina)<sup>a</sup>, Department of Soil Microbiology and Symbiotic Systems, Estación Experimental del Zaidín, Consejo Superior de Investigaciones Científicas (CSIC), Granada (Spain)<sup>b</sup>, Institute of Microbiology, University Stuttgart, Stuttgart, (Germany)<sup>c</sup>.

**TABLE S1** Plasmids and bacterial strains used in this study.

| Plasmid and strains                                 | Relevant characteristics                                                                                                              | Reference or source     |
|-----------------------------------------------------|---------------------------------------------------------------------------------------------------------------------------------------|-------------------------|
| pRK2013                                             | ColE1 replicon, tra <sup>+</sup> from RK2, Km <sup>R</sup>                                                                            | 1                       |
| pGEM@-T Easy                                        | Cloning vector, Ap <sup>R</sup>                                                                                                       | Promega                 |
| pK18 <i>mob</i>                                     | Mob <sup>+</sup> Km <sup>R</sup> , suicide in rhizobia                                                                                | 2                       |
| pG18 <i>mob2</i>                                    | Mob <sup>+</sup> Gm <sup>R</sup> , suicide in rhizobia                                                                                | 3                       |
| pBBR1-MCS-4                                         | Km <sup>R</sup> , broad host range vector                                                                                             | 4                       |
| pBBR1-MCS-5                                         | Gm <sup>R</sup> , broad host range vector                                                                                             | 4                       |
| pHP45ΩSm                                            | Ap <sup>R</sup> /Sm <sup>R</sup> /Sp <sup>R</sup> , donor of Ω Sm/Sp interposon                                                       | 5                       |
| pHP45ΩKm                                            | Ap <sup>R</sup> /Km <sup>R</sup> , donor of Ω Km interposon                                                                           | 5                       |
| pCB303                                              | Tc <sup>R</sup> , <i>lacZ</i> , <i>phoA</i> , <i>oriT</i>                                                                             | 6                       |
| pIQ35                                               | pGemT-easy with <i>phaR</i> internal fragment (244 bp), amplified with Fw1 and Rv1 (blr0227 spanning bases 224,141 to 224,384)        | This work               |
| pIQ36                                               | pG18 <i>mob2</i> with <i>phaR</i> fragment (262 bp digested EcoRI from pIQ35)                                                         | This work               |
| pIQ37                                               | pBBR1-MCS5 with 1,245 bp fragment amplified with Fw1c and Rv1c carrying the entire blr0227 ORF (bases 223,562 to 224,806) cloned SmaI | This work               |
| pIQ38                                               | pCB303 with the entire <i>phaR</i> (1,265 bp) XbaI PstI digested from pIQ37                                                           | This work               |
| pIQ39                                               | pBBR1MCS4 with <i>phaP1</i> dw fragment (235 bp)                                                                                      | This work               |
| pIQ40                                               | pBBR1MCS4 with <i>phaP4</i> dw fragment (222 bp)                                                                                      | This work               |
| pIQ41                                               | pIQ39 with <i>phaP1</i> up fragment (249 bp) cloned EcoRV                                                                             | This work               |
| pIQ42                                               | pIQ40 with <i>phaP4</i> up fragment (253 bp) cloned EcoRV                                                                             | This work               |
| pIQ43                                               | pIQ41 with Ω Sm/Sp interposon from digested EcoRI pHP45                                                                               | This work               |
| pIQ44                                               | pIQ42 with Ω Km interposon from digested EcoRI pHP45                                                                                  | This work               |
| pIQ45                                               | pK18 <i>mob</i> with <i>phaP1</i> up-Ω Sm/Sp- <i>phaP1</i> dw fragment (2,560 bp) from digested XbaI KpnI pIQ43                       | This work               |
| pIQ46                                               | pG18 <i>mob2</i> with <i>phaP4</i> up-Ω Sm/Sp- <i>phaP4</i> dw fragment (2,817 bp) from digested XbaI KpnI pIQ44                      | This work               |
| USDA 110                                            | <i>Bradyrhizobium diazoefficiens</i> wild-type                                                                                        | USDA culture collection |
| LP 3004                                             | <i>B. diazoefficiens</i> USDA 110 spontaneous Sm <sup>R</sup>                                                                         | 7                       |
| USDA 110 <i>spc4</i>                                | <i>B. diazoefficiens</i> USDA 110 spontaneous Sp <sup>R</sup>                                                                         | 8                       |
| 9043<br>( <i>fixK2</i> mutant)                      | <i>B. diazoefficiens</i> USDA 110 <i>spc4</i> derivative, Sp <sup>R</sup> Sm <sup>R</sup><br><i>fixK2::Ω</i>                          | 9                       |
| LP 0227<br>( <i>phaR</i> mutant)                    | <i>B. diazoefficiens</i> LP 3004 with pIQ36 inserted in blr0227                                                                       | This work               |
| LP 0227 pIQ38<br>( <i>phaR</i> mutant complemented) | <i>B. diazoefficiens</i> LP 0227 with pIQ38                                                                                           | This work               |
| LP 5155<br>(Δ <i>phaP1</i> )                        | <i>B. diazoefficiens</i> USDA 110 with Ω Sm/Sp-cassette replacing 301 bp of bl5155                                                    | This work               |
| LP 7395<br>(Δ <i>phaP4</i> )                        | <i>B. diazoefficiens</i> USDA 110 with Ω Km-cassette replacing 426 bp of bl7395                                                       | This work               |
| LP 5173<br>(Δ <i>phaP1</i> /Δ <i>phaP4</i> )        | <i>B. diazoefficiens</i> LP 7395 with Ω Sm/Sp-cassette replacing 301 bp of bl5155                                                     | This work               |
| DH5α                                                | <i>Escherichia coli supE44 ΔlacU169 (φ80 lacZAM15) hsdR17 recA1 gyrA96 thi-1 relA1</i>                                                | Bethesda Res. Lab.      |
| S17-1                                               | <i>E. coli</i> Sm <sup>R</sup> Sp <sup>R</sup> <i>hsdR</i> (RP4-2 <i>kan::Tn7 tet::Mu</i> ; integrated into the chromosome)           | 10                      |

**TABLE S2** Primers used in this study.

| Primers                           | Sequence (5' to 3')   | Reference        |
|-----------------------------------|-----------------------|------------------|
| Primers for cloning               |                       |                  |
| M13F                              | GTAAAACGACGGCCAGT     | Universal primer |
| M13R                              | GCGGATAACAATTTACACAGG | Universal primer |
| Fw1                               | GGTCAAGGATGGCGAAGA    | This work        |
| Rv1                               | GATCTGCTTGCGGAATT     | This work        |
| Fw1c ( <i>phaR</i> complementing) | ATCTGGCCCATGATGACTTC  | This work        |
| Rv1c ( <i>phaR</i> complementing) | TTACCCAGGAAGCAGTTTG   | This work        |
| Fw2                               | AACACGTCCAGGGAATCAAG  | This work        |
| Rv2                               | CGAACTGCTCTTTCCCGTAG  | This work        |
| Fw3                               | CCGGAATGACGAAGTACACC  | This work        |
| Rv3                               | TCACGATCATGGAAAATGGA  | This work        |
| Fw4                               | TTCTTGCTTCCAGGATGTCC  | This work        |
| Rv4                               | GAATGAACAGCGCGTTGAAT  | This work        |
| Fw5                               | TTATTTGGGCATGATCCCAT  | This work        |
| Rv5                               | CTCAGTTGGTTAGAGCGCCT  | This work        |
| KmF (checking)                    | TGTATGGGAAGCCCGATG    | 11               |
| KmR (checking)                    | TGCCATTCTACCGGATT     | 11               |
| Sm/Sp (checking)                  | CGGTGGATGACCTTTTGAAT  | 12               |
| FwCh1 ( <i>phaP1</i> checking)    | CGGTACCTGCTGTTCAATCG  | This work        |
| RvCh2 ( <i>phaP1</i> checking)    | GAGCCGCTATTCTGGCTAAG  | This work        |
| FwCh3 ( <i>phaP4</i> checking)    | GCTGCAACAGCTTGAGTACG  | This work        |
| RvCh4 ( <i>phaP4</i> checking)    | GTAGCCCGATGGATTCTCAG  | This work        |
| Primers for qRT-PCR               |                       |                  |
| <i>sigA</i> -1069F                | GAGATCATCGTCGAGGTGAAG | 13               |
| <i>sigA</i> -1155R                | GCGCTTGTTGATGTCGTAGA  | 13               |
| <i>fixK2</i> _14                  | TGCGCAGCTACAAGCTTCTC  | This work        |
| <i>fixK2</i> _15                  | CTGGTGTGATGATGGCTTC   | This work        |
| <i>phaR</i> -Fw                   | AAATCAGACCAACCCACCAC  | This work        |
| <i>phaR</i> -Rv                   | GCGTCGTAGACCAGGAAATC  | This work        |
| <i>phaC1</i> -Fw                  | CAAGCTCGCCAAGGACTATC  | This work        |
| <i>phaC1</i> -Rv                  | ACTGGTTGACTTCCATTCC   | This work        |
| <i>phaC2</i> -Fw                  | AATCCCTGGTCCGGTATCT   | This work        |
| <i>phaC2</i> -Rv                  | ACTCCGAGCTTGCGATAGTC  | This work        |
| <i>phaC3</i> -Fw                  | GCTCAGCCCTGAATTTATCG  | This work        |
| <i>phaC3</i> -Rv                  | TGGTATAGCCGCTTCATGTG  | This work        |
| <i>phaP1</i> -Fw                  | TCAGAGCTACGGAAAGAGC   | This work        |
| <i>phaP1</i> -Rv                  | TTCTTGGTGTAGTCGCCGTA  | This work        |
| <i>phaP4</i> -Fw                  | AGGTGCGACTGATCCATTCT  | This work        |
| <i>phaP4</i> -Rv                  | GTCCTTGAACCTGGCGTAGC  | This work        |

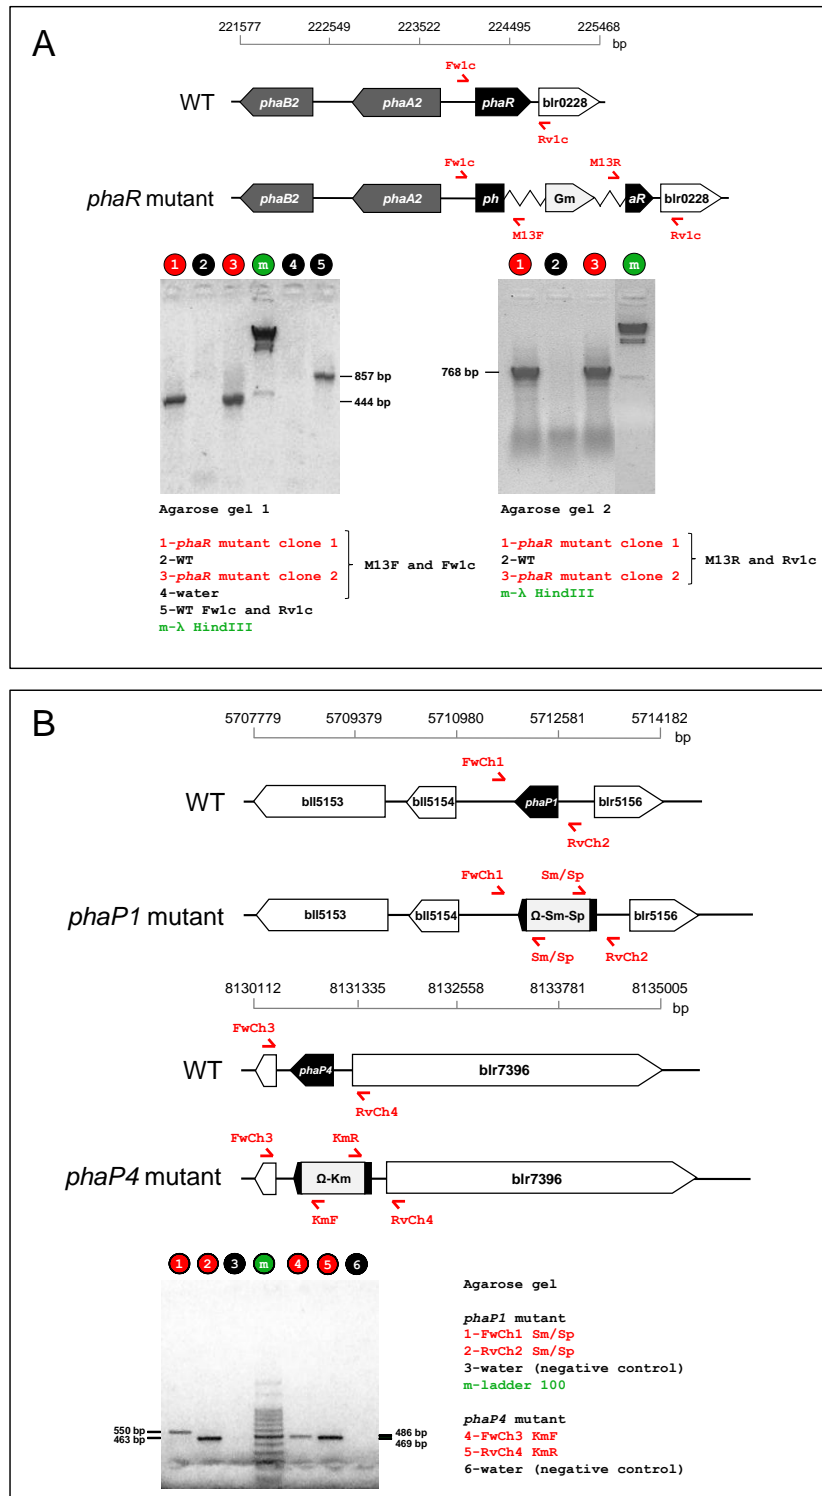

**FIG S1** Genotypes of the wildtype and mutant strains for *phaR*, *phaP1* and *phaP4* regions. (A) Diagram of the region containing *phaR* (black), *phaA2* and *phaB2* (grey) in the wildtype (WT) and the *phaR* mutant. Red arrows indicate the primers used to confirm the insertional mutation according to the PCR results shown below the diagrams. Two independent clones were assessed in this way. (B) The same analysis was done for the selected candidates of *phaP1* and *phaP4* mutants.

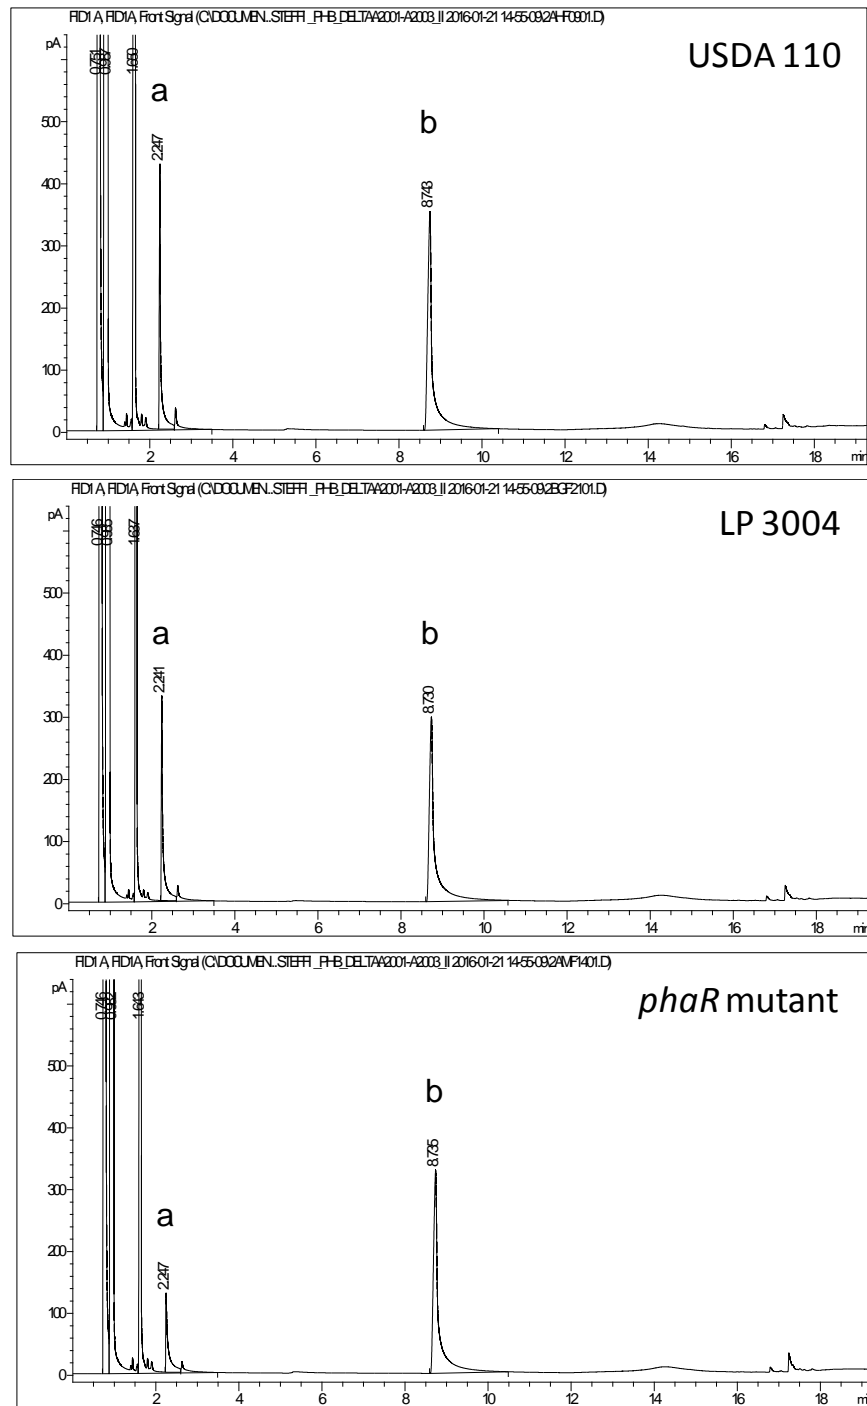

**FIG S2** GC-chromatograms of *B. diazoefficiens* samples at late stationary-phase (25 days) cultured in Götz minimal medium in oxic conditions. The peak at  $2.24 \pm 0.006$  min (a) represents 3-hydroxybutyryl-methyl esters, and the peak at  $8.73 \pm 0.013$  min (b) represents benzoate-methyl ester (internal standard). There is no evidence of substantial amounts of 3-HV or other hydroxyalkanoic acids

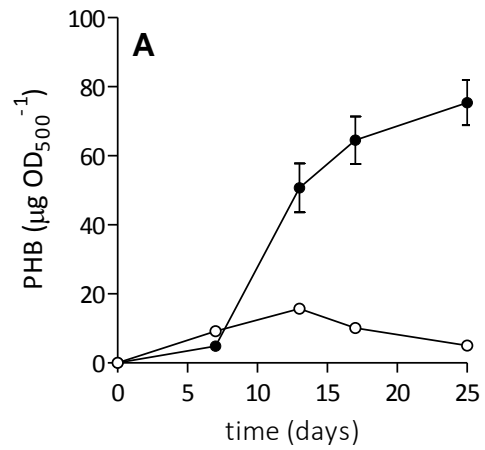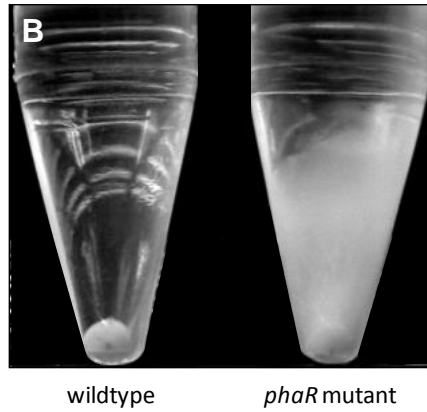

**FIG S3** PHB and EPS accumulation in *B. diazoefficiens*. (A) Time-course of PHB accumulation of wildtype (black circles) and *phaR* mutant (white circles) in Götz minimal medium under oxic conditions. (B) Cell pellets at late-stationary phase (25 days). Note the compactness of the wildtype in comparison with the mucoidy of *phaR* mutant.

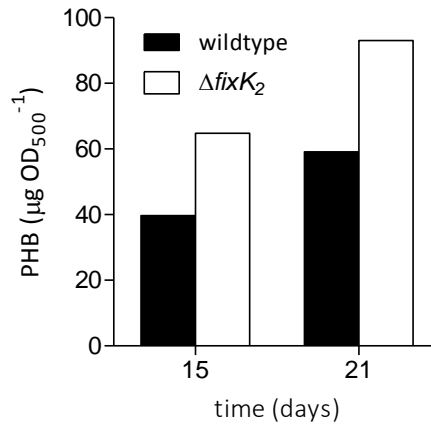

**FIG S4** PHB accumulation of *B. diazoefficiens* wildtype (black bars) and  $\Delta fixK_2$  (white bars) at middle-stationary phase of growth in Götzt minimal medium under oxic conditions.

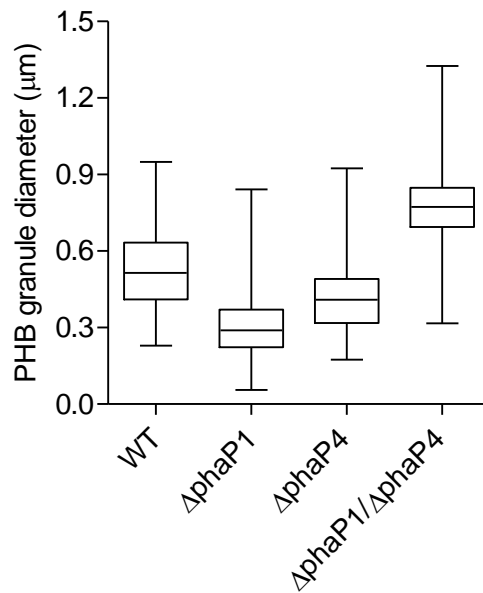

**FIG S5** PHB granule diameters in wildtype and their *phaP* mutant derivatives at middle-stationary phase (17 days) of growth cultured in Götzt minimal medium under oxic conditions. Each data point represents the mean of 176 (wildtype), 411 ( $\Delta phaP1$ ), 151 ( $\Delta phaP4$ ), and 132 ( $\Delta phaP1/\Delta phaP4$ ) individual measurements of PHB granule diameters.

## REFERENCES

1. **Figurski DH, Helinski DR.** 1979. Replication of an origin-containing derivative of plasmid RK2 dependent on a plasmid function provided in trans. *Proc Natl Acad Sci USA* **76**:1648-1652.
2. **Schäfer A, Tauch A, Jäger W, Kalinowski J, Thierbach G, Pühler A.** 1994. Small mobilizable multi-purpose cloning vectors derived from the *Escherichia coli* plasmids pK18 and pK19: selection of defined deletions in the chromosome of *Corynebacterium glutamicum*. *Gene* **145**:69-73.
3. **Kirchner O, Tauch A.** 2003. Tools for genetic engineering in the amino acid-producing bacterium *Corynebacterium glutamicum*. *J Biotechnol* **104**:287-299.
4. **Kovach ME, Elzer PH, Hill DS, Robertson GT, Farris MA, Roop RM, Peterson KM.** 1995. Four new derivatives of the broad-host range cloning vector pBBR1MCS, carrying different antibiotic-resistance cassettes. *Gene* **166**:175-176.
5. **Prentki P, Krisch HM.** 1984. *In vivo* insertional mutagenesis with a selectable DNA fragment. *Gene* **29**:303-313.
6. **Schneider K, Beck CF.** 1987. New expression vectors for identifying and testing signal structures for initiation and termination of transcription. *Methods Enzymol* **153**:452-461.
7. **López-García SL, Vázquez TEE, Favelukes G, Lodeiro AR.** 2002. Rhizobial position as a main determinant in the problem of competition for nodulation in soybean. *Environ Microbiol* **4**:216-224.
8. **Regensburger B, Hennecke H.** 1983. RNA polymerase from *Rhizobium japonicum*. *Arch Microbiol* **135**:103-109.
9. **Nellen-Anthamatten D, Rossi P, Preisig O, Kullik I, Babst M, Fischer H-M, Hennecke H.** 1998. *Bradyrhizobium japonicum* FixK<sub>2</sub>, a crucial distributor in the FixLJ-dependent regulatory cascade for control of genes inducible by low oxygen levels *J Bacteriol* **180**:5251-5255.
10. **Simon R, Priefer U, Pühler A.** 1983. Vector plasmids for *in vivo* and *in vitro* manipulations of Gram negative bacteria, p 98-106. *In* Pühler A (ed), *Molecular genetics of the bacteria-plant interaction*. Springer, Berlin, Germany.
11. **Mongiardini EJ, Pérez-Giménez J, Althabegoiti MJ, Covelli J, Quelas JI, López-García SL, Lodeiro AR.** 2009. Overproduction of the rhizobial adhesin RapA1 increases competitiveness for nodulation. *Soil Biol. Biochem.* **41**:2017-2020.
12. **Quelas JI, Mongiardini EJ, Pérez Giménez J, Parisi G, Lodeiro AR.** 2013. Analysis of two polyhydroxyalkanoate (PHA) synthases in *Bradyrhizobium japonicum* USDA 110. *J Bacteriol* **195**:3145-3155. doi: 10.1128/JB.02203-12.
13. **Lindemann A, Moser A, Pessi, G, Hauser, F, Friberg M, Hennecke H, Fischer, HM.** 2007. New target genes controlled by the *Bradyrhizobium japonicum* two-component regulatory system RegSR. *J. Bacteriol.* **189**:8928-8943.
